# Supplementary material for: Socioeconomic Status and Mental Health Service Use Among National Guard Soldiers
Source: Atypon-hosted journal article supplement (doi:10.1176/appi.ps.201400346), 2015-05-01
Supplement: appi.ps.201400346.ds001.pdf [file appi.ps.201400346.ds001.pdf]

## Supplemental Methods

### *Participants and Procedures*

Soldiers were recruited in person during monthly drill weekends and by mail using a slightly modified version of the Dillman method (1). During drill weekends, a member of the study team would brief the soldiers, describing the survey. Team members would distribute the survey packets (which included questionnaires used in study measures) and remain onsite for several hours to collect completed surveys. Surveys that were not distributed during drill weekends were sent via USPS, with up to two additional follow-up mailings being sent to nonrespondents. The survey took approximately 30-45 minutes to complete. Soldiers received a \$50 gift card incentive and the response rate was 55%

### *Outcome Measures*

PTSD. PTSD symptoms were measured using the posttraumatic disorder checklist – specific version (PCL-S), a 17-item self-report measure of PTSD symptoms based on DSM-IV criteria (2). Participants were asked to complete the questionnaire in reference to “the most distressing event” they had experienced in their lifetime, which could be either deployment-related incidents or non-deployment incidents during their lifetime. A score of 50 or above has often been used to indicate a high probability of a clinical diagnosis of PTSD (2). Internal consistency as measured by Cronbach’s alpha was .97 in our sample.

Mental Health Service Utilization. Participants were asked whether they had received mental health services for a stress, emotional, alcohol, or family problem from any of the following 14 sources in the past year: mental health professional at a VA hospital or Community Based Outpatient Center, general medical doctor at a VA hospital or Community Based Outpatient Center, mental health professional at a military facility, general medical doctor at a military facility, military chaplain, mental health professional at a civilian facility, general medical doctor at a civilian facility, civilian clergy, Military Family Life Consultant, individual and/or group counseling for Veterans at a Vet Center, family counseling for military-related issues at a Vet Center, military sexual trauma counseling or referral at a Vet Center, other Vet Center care, or other care. Participants were classified as having utilized mental health services if they provided an affirmative answer to any of the 14 items. Participants were then asked to check all specific types of services they received, if they had used services in the last 12 months: medication, individual therapy, group therapy, substance abuse treatment, and family/marital therapy.

### *Independent variables*

Socioeconomic Status (SES). SES was measured via separate proxy variables and also by a composite score (3). Proxy variables included highest level of education (categorized as High School Diploma/GED, Some College/Associate’s Degree, or Bachelor’s Degree or greater); annual family income (categorized as \$25,000 or less, \$25,001 to \$50,000, or greater than \$50,000); and current rank or rank at last discharge (categorized as Junior Enlisted, Noncommissioned Officer (NCO), or Officer). Military rank may exhibit associations with

health status that are independent of other SES variables. For instance, across multiple large-scale veteran surveys, enlisted veterans report worse health than officers, even after controlling for sociodemographic characteristics (including education and income) and length of service (4). Composite SES score was calculated as the sum of Z-scores of education and income (5).

Short Form-12 Health Survey Physical component score (SF-12 version 2). This is a 12-item physical health component of the SF-12, a widely used shortened version of the SF-36 Health Survey. The SF-12 has good construct validity and test-retest reliability, and is strongly correlated with the SF-36 (6). The physical health component assesses the participant's subjective opinion of his/her health (e.g., "excellent" to "poor") and the extent to which physical health limits the participant's day-to-day activities. Higher scores indicate better health. Since comorbid medical illness in PTSD may be associated with greater use of mental health treatment (7), the physical component score was added as a covariate in regression analyses.

Any Mental Health Condition. Participants were classified as having a mental health condition by a PTSD Checklist Score Specific (PCL-S) score of 50 or above, a Patient Health Questionnaire Score-9 (PHQ-9) score of 10 or above (8), or a generalized anxiety disorder seven (GAD-7) score of 10 or above (9).

Health Insurance. Health insurance coverage is associated with healthcare utilization in national surveys (e.g., 10) and veteran samples (e.g., 11). In the current questionnaire, insurance was assessed using the question, "What kind of health insurance or health care coverage do you have?" Individual response options included private health insurance (i.e. employer sponsored), Medicaid, Medicare, military health care (such as TRICARE), VA Healthcare System, other government program, and no coverage of any type. For the current study, responses of private health insurance and TRICARE were coded as private health insurance. Private insurance status was then added to regression models as a dichotomous covariate.

#### *Covariates*

Age group, sex, race/ethnicity, and marital status were determined by soldiers' responses to demographic items on the survey.

Combat exposure was determined by an affirmative response to at least one of three combat questions on the Post-deployment Health Assessment, in regards to the most recent or any prior deployment ("Did you encounter dead bodies or see people killed or wounded?", "Were you engaged in direct combat where you discharged a weapon?", and "Did you ever feel that you were in great danger of being killed?").

The Alcohol Use Disorders Identification Test. Hazardous alcohol use was assessed using the AUDIT-C, a 3-item alcohol screen for hazardous drinking and active alcohol use disorders (12). The 3-item measure is an abbreviated version of the original 10-item AUDIT. Each question in the AUDIT-C is scored 0 to 4 points, with the scores summed for a possible score of 0 to 12. For detection of heavy drinking, the AUDIT-C performs better than the entire AUDIT, and has equivalent performance to the entire AUDIT for detection of either heavy drinking and/or active

alcohol abuse or dependence (12). In men, a score of 4 or more is considered positive, and in women, a score of 3 or more is considered positive.

#### Data Analysis

All of the analyses for this study were conducted using SAS version 9.3 (SAS Institute, Inc., 2010). Wilcoxon-Mann-Whitney and chi-square tests examined the relationship between measures of SES and PCL symptoms consistent with a PTSD diagnosis, as well as the relationship between SES and mental health service utilization. Linear regression was used to examine associations with PTSD symptom severity. Multivariable logistic regression was used to calculate adjusted odds ratios (ORs) with 95% confidence intervals (CIs) for PTSD diagnosis and service utilization.

#### References

1. Dillman D, Smyth J, Christian L. Internet, Mail, and Mixed-Mode Surveys: The Tailored Design Method. New York: Wiley; 2009
2. Weathers FW, Litz BT, Herman DS, et al. The PTSD Checklist (PCL): Reliability, validity, and diagnostic utility. 9th Annual Conference of the ISTSS; San Antonio, TX1993.
3. Oakes JM. The Measurement of SES. NIH OBSSR Online Textbook Research Methods for Health Research <http://www.sourceresearch.org/2012>.
4. Maclean A, Edwards RD: The Pervasive Role of Rank in the Health of U.S. Veterans. *Armed Forces Soc* 36:765-785, 2010
5. Cohen S, Doyle WJ, Baum A: Socioeconomic status is associated with stress hormones. *Psychosom Med* 68:414-420, 2006
6. Ware J, Jr., Kosinski M, Keller SD: A 12-Item Short-Form Health Survey: construction of scales and preliminary tests of reliability and validity. *Med Care* 34:220-233, 1996

7. Sripada RK, Pfeiffer PN, Valenstein M, et al: Medical illness burden is associated with greater PTSD service utilization in a nationally representative survey. *Gen Hosp Psychiatry*, 2014
8. Kroenke K, Spitzer RL, Williams JB: The PHQ-9: validity of a brief depression severity measure. *J Gen Intern Med* 16:606-613, 2001
9. Spitzer RL, Kroenke K, Williams JB, et al: A brief measure for assessing generalized anxiety disorder: the GAD-7. *Arch Intern Med* 166:1092-1097, 2006
10. Wang PS, Lane M, Olfson M, et al: Twelve-month use of mental health services in the United States: results from the National Comorbidity Survey Replication. *Arch Gen Psychiatry* 62:629-640, 2005
11. Shen Y, Hendricks A, Wang F, et al: The impact of private insurance coverage on veterans' use of VA care: insurance and selection effects. *Health Serv Res* 43:267-286, 2008
12. Bush K, Kivlahan DR, McDonnell MB, et al: The AUDIT alcohol consumption questions (AUDIT-C): an effective brief screening test for problem drinking. Ambulatory Care Quality Improvement Project (ACQUIP). Alcohol Use Disorders Identification Test. *Arch Intern Med* 158:1789-1795, 1998

| <b>Characteristic</b>                             | <b>N</b>       | <b>%</b> | <b>Supplemental Table<br/>1 Demographic<br/>characteristics of<br/>the sample<br/>(N=1,268)</b> |
|---------------------------------------------------|----------------|----------|-------------------------------------------------------------------------------------------------|
| Gender                                            |                |          |                                                                                                 |
| Male                                              | 1179           | 93       |                                                                                                 |
| Female                                            | 89             | 7        |                                                                                                 |
| Age                                               |                |          |                                                                                                 |
| 18–21                                             | 100            | 8        |                                                                                                 |
| 22–30                                             | 542            | 43       |                                                                                                 |
| 31–40                                             | 318            | 25       |                                                                                                 |
| 41–50                                             | 252            | 20       |                                                                                                 |
| Over 50                                           | 56             | 4        |                                                                                                 |
| Marital status                                    |                |          |                                                                                                 |
| In committed relationship                         | 787            | 62       |                                                                                                 |
| Not in committed relationship                     | 481            | 38       |                                                                                                 |
| Ethnicity                                         |                |          |                                                                                                 |
| White                                             | 1065           | 84       |                                                                                                 |
| Non-white                                         | 203            | 16       |                                                                                                 |
| Education                                         |                |          |                                                                                                 |
| High school diploma/GED                           | 323            | 26       |                                                                                                 |
| Some college/Associate's degree                   | 705            | 56       |                                                                                                 |
| Bachelor's degree or greater                      | 240            | 19       |                                                                                                 |
| Income                                            |                |          |                                                                                                 |
| \$25,000 or less                                  | 347            | 27       |                                                                                                 |
| \$25,001 to \$50,000                              | 449            | 35       |                                                                                                 |
| Greater than \$50,000                             | 472            | 37       |                                                                                                 |
| Rank                                              |                |          |                                                                                                 |
| Enlisted                                          | 538            | 42       |                                                                                                 |
| Noncommissioned Officer (NCO)                     | 564            | 45       |                                                                                                 |
| Officer                                           | 166            | 13       |                                                                                                 |
| Combat exposure during deployment                 |                |          |                                                                                                 |
| Yes                                               | 875            | 69       |                                                                                                 |
| No                                                | 393            | 31       |                                                                                                 |
| Mental health                                     |                |          |                                                                                                 |
| Likely PTSD diagnosis (PCL $\geq$ 50)             | 193            | 15       |                                                                                                 |
| Likely GAD diagnosis (GAD-7 $\geq$ 10)            | 197            | 16       |                                                                                                 |
| Likely depression diagnosis (PHQ-9 $\geq$ 10)     | 245            | 19       |                                                                                                 |
| Any likely mental health diagnosis                | 321            | 25       |                                                                                                 |
| Hazardous alcohol use (AUDIT-C $\geq$ 4)          |                |          |                                                                                                 |
| Yes                                               | 615            | 49       |                                                                                                 |
| No                                                | 651            | 51       |                                                                                                 |
| Insurance Coverage                                |                |          |                                                                                                 |
| Private/Military Insurance                        | 977            | 77       |                                                                                                 |
| Medicare/Medicaid/Other Government program        | 32             | 3        |                                                                                                 |
| VA Healthcare System                              | 290            | 23       |                                                                                                 |
| No Coverage                                       | 56             | 4        |                                                                                                 |
| SF-12 physical component T-score<br>mean $\pm$ SD | 50.6 $\pm$ 9.1 |          |                                                                                                 |

**Supplemental Table 2 Rates of mental health treatment utilization among the entire sample, the**

| <b>Treatment type</b>     | <b>Entire sample<br/>(N=1,268)</b> |          | <b>Any mental health<br/>condition (N=321)</b> |          | <b>PTSD<br/>(N=193)</b> |          |
|---------------------------|------------------------------------|----------|------------------------------------------------|----------|-------------------------|----------|
|                           | <b>N</b>                           | <b>%</b> | <b>N</b>                                       | <b>%</b> | <b>N</b>                | <b>%</b> |
| Any treatment             | 401                                | 32       | 188                                            | 59       | 135                     | 70       |
| Medication                | 196                                | 16       | 97                                             | 31       | 75                      | 39       |
| Individual therapy        | 199                                | 16       | 118                                            | 37       | 93                      | 48       |
| Group therapy             | 32                                 | 3        | 25                                             | 8        | 18                      | 9        |
| Substance abuse treatment | 15                                 | 1        | 10                                             | 3        | 5                       | 3        |
| Family/Marital therapy    | 64                                 | 5        | 25                                             | 8        | 20                      | 10       |

**subset with mental health conditions, and the subset with PTSD**



**Supplemental Table 3 SES Differences in Mental Health Service Utilization (N=1,268)**

| Variable                        | Any treatment<br>(N=401) |    | Medication<br>(N=196) |    | Individual<br>therapy<br>(N=199) |    | Group therapy<br>(N=32) |   | Substance<br>abuse treatment<br>(N=15) |    | Family/Marital<br>therapy<br>(N=64) |   |
|---------------------------------|--------------------------|----|-----------------------|----|----------------------------------|----|-------------------------|---|----------------------------------------|----|-------------------------------------|---|
|                                 | N                        | %  | N                     | %  | N                                | %  | N                       | % | N                                      | %  | N                                   | % |
| Education                       |                          |    |                       |    |                                  |    |                         |   |                                        |    |                                     |   |
| High school diploma/GED         | 100                      | 31 | 56                    | 17 | 45                               | 14 | 15                      | 5 | 11                                     | 3  | 17                                  | 5 |
| Some college/Associate's degree | 222                      | 32 | 115                   | 16 | 113                              | 16 | 14                      | 2 | 3                                      | .4 | 28                                  | 4 |
| Bachelor's degree or greater    | 79                       | 33 | 25                    | 10 | 41                               | 17 | 3                       | 1 | 1                                      | .4 | 19                                  | 8 |
| <i>Chi-square<sup>a</sup></i>   | .26                      |    | 5.93                  |    | 1.17                             |    | 8.31*                   |   | —                                      |    | 5.86                                |   |
| <i>Effect size (phi)</i>        | .01                      |    | .07                   |    | .03                              |    | .08                     |   | —                                      |    | .07                                 |   |
| Income                          |                          |    |                       |    |                                  |    |                         |   |                                        |    |                                     |   |
| \$25,000 or less                | 100                      | 29 | 61                    | 18 | 36                               | 10 | 10                      | 3 | 7                                      | 2  | 10                                  | 3 |
| \$25,001 to \$50,000            | 145                      | 32 | 72                    | 16 | 78                               | 17 | 15                      | 3 | 5                                      | 1  | 21                                  | 5 |
| Greater than \$50,000           | 156                      | 33 | 63                    | 13 | 85                               | 18 | 7                       | 2 | 3                                      | 1  | 33                                  | 7 |
| <i>Chi-square</i>               | 1.80                     |    | 2.92                  |    | 10.29**                          |    | 3.48                    |   | 3.29                                   |    | 7.25*                               |   |
| <i>Effect size (phi)</i>        | .04                      |    | .05                   |    | .09                              |    | .05                     |   | .05                                    |    | .08                                 |   |
| Rank                            |                          |    |                       |    |                                  |    |                         |   |                                        |    |                                     |   |
| Enlisted                        | 147                      | 27 | 72                    | 13 | 66                               | 12 | 14                      | 3 | 10                                     | 2  | 23                                  | 4 |
| NCO                             | 206                      | 37 | 111                   | 20 | 108                              | 19 | 16                      | 3 | 5                                      | 1  | 27                                  | 5 |
| Officer                         | 48                       | 29 | 13                    | 8  | 25                               | 15 | 2                       | 1 | 0                                      | 0  | 14                                  | 8 |
| <i>Chi-square</i>               | 11.43**                  |    | 16.86***              |    | 9.91**                           |    | 1.41                    |   | 4.51                                   |    | 4.72                                |   |
| <i>Effect size (phi)</i>        | .09                      |    | .12                   |    | .09                              |    | .03                     |   | .06                                    |    | .06                                 |   |
| Composite SES                   |                          |    |                       |    |                                  |    |                         |   |                                        |    |                                     |   |
| <i>Z-score</i>                  | 1.47                     |    | -2.01*                |    | 2.86**                           |    | -2.20*                  |   | -2.74**                                |    | 2.92**                              |   |

<sup>a</sup>df=2

NCO=Noncommissioned Officer

\*p<.05, \*\*p<.01, \*\*\*p<.001



**Supplemental Table 4 Summary of logistic regression analyses examining associations between SES variables and PTSD among the entire sample (N=1,268)<sup>a</sup>**

| <b>Variable</b>     | <b>OR</b> | <b>95% CI</b> | <b>SE</b> |
|---------------------|-----------|---------------|-----------|
| Income              |           |               |           |
| >\$50,000           | .60*      | .38–.95       | .23       |
| Non-white ethnicity | 1.65*     | 1.11–2.45     | .20       |
| Combat exposure     | 4.82***   | 2.92–7.95     | .26       |
| Rank                |           |               |           |
| Officer             | .49*      | .26–.91       | .32       |
| Non-white ethnicity | 1.66*     | 1.12–2.47     | .20       |
| Combat exposure     | 4.67***   | 2.83–7.72     | .26       |
| Composite SES       |           |               |           |
| SES                 | .89*      | .80–.99       | .06       |
| Non-white ethnicity | 1.66*     | 1.12–2.46     | .20       |
| Combat exposure     | 4.75***   | 2.88–7.83     | .25       |

<sup>a</sup>All models are adjusted for age, marital status, ethnicity, and combat exposure.

\*p<.05, \*\*\*p<.001

**Supplemental Table 5 Summary of linear regression analyses predicting PTSD severity from composite SES<sup>a</sup>**

| Variable                    | Entire sample (N=1,268) |      | PTSD subset (N=193) |      |
|-----------------------------|-------------------------|------|---------------------|------|
|                             | $\beta$                 | SE   | $\beta$             | SE   |
| Total PCL score             |                         |      |                     |      |
| Composite SES               | -.81**                  | .29  | -1.03*              | .47  |
| Non-white ethnicity         | 3.33**                  | 1.17 | .40                 | 1.66 |
| Combat exposure             | 8.83***                 | .95  | .96                 | 2.38 |
| PCL reexperiencing symptoms |                         |      |                     |      |
| Composite SES               | -.11                    | .08  |                     |      |
| Non-white ethnicity         | 1.05**                  | .35  |                     |      |
| Combat exposure             | 2.61***                 | .28  |                     |      |
| PCL avoidance symptoms      |                         |      |                     |      |
| Composite SES               | -.28*                   | .12  |                     |      |
| In committed relationship   | -.86*                   | .39  |                     |      |
| Non-white ethnicity         | 1.42**                  | .49  |                     |      |
| Combat exposure             | 3.02***                 | .39  |                     |      |
| PCL hyperarousal symptoms   |                         |      |                     |      |
| Composite SES               | -.43***                 | .10  |                     |      |
| Age 41-50                   | 1.55*                   | .72  |                     |      |
| Combat exposure             | 3.16***                 | .35  |                     |      |

\*p<.05, \*\*p<.01, \*\*\*p<.001

<sup>a</sup>All models are adjusted for sex, age, marital status, ethnicity, and combat exposure.

PCL=PTSD Checklist. Possible scores range from 17 to 85.

**Supplemental Table 6 Summary of logistic regression analyses predicting types of mental health service utilization from Composite**

| Variable                         | Medication |         | Individual Therapy |           | Group Therapy |          | Substance Abuse Treatment |          | Family/Marital Therapy |           |
|----------------------------------|------------|---------|--------------------|-----------|---------------|----------|---------------------------|----------|------------------------|-----------|
|                                  | OR         | 95% CI  | OR                 | 95% CI    | OR            | 95% CI   | OR                        | 95% CI   | OR                     | 95% CI    |
| SES                              | .83*       | .72–.96 | 1.12               | .98–1.29  | .70           | .38–1.29 | .75                       | .36–1.57 | 1.21                   | 1.00–1.47 |
| SES*PTSD diagnosis               |            |         |                    |           |               |          |                           |          |                        |           |
| PTSD                             |            |         | 5.04*              | 2.81–8.90 |               |          |                           |          |                        |           |
| No PTSD                          |            |         | 1.13               | .99–1.30  |               |          |                           |          |                        |           |
| <b>SES (N=1,262)<sup>a</sup></b> |            |         |                    |           |               |          |                           |          |                        |           |

<sup>a</sup>Models are adjusted for sex, age, marital status, ethnicity, combat exposure, hazardous alcohol use, private insurance status, SF-12 physical health subscale, psychiatric diagnosis, and SES\*psychiatric diagnosis.

<sup>b</sup>Reference group aged 18-21.

\*p<.05.
